# Supplementary material for: Indirect Impact of the COVID-19 Pandemic on Natural Gas Consumption by Commercial Consumers in a Selected City in Poland
Source: MDPI journal article supplement (doi:10.3390/en15041393), 2022-02-14
Supplement: s1 [file s1]

# **THE IMPACT OF THE COVID-19 PANDEMIC ON NATURAL GAS CONSUMPTION BY COMMERCIAL CONSUMERS IN A SELECTED CITY IN POLAND**

Tomasz Cieřlik<sup>1,3</sup>, Piotr Narloch<sup>2,3</sup>, Adam Szurlej<sup>3</sup>, Krzysztof Kogut<sup>4</sup>

<sup>1</sup> Institute of Nuclear Physics PAN, Radzikowski St 152, 31342 Kraków, Poland

<sup>2</sup> Polish Gas Company, Bandrowskiego St 16, 33100 Tarnów, Poland

<sup>3</sup> AGH University of Science and Technology, Faculty of Drilling, Oil and Gas, Mickiewicz Av 30, 30059 Kraków, Poland

<sup>4</sup> AGH University of Science and Technology, Faculty of Energy and Fuels, Mickiewicz Av 30, 30059 Kraków, Poland

## **SUPPLEMENTARY MATERIALS**

Supplementary material contains 11 pages (including 9 tables and 1 figure).

**Table SI.1.** Information about all artificial neural networks models for average temperature

| No. Models | Independent parameter |            |          |                                                         |                          |              |                  |        | Name of the artificial neural network | The number of neurons in the hidden layer | Activation function |              | MAPE [%] |
|------------|-----------------------|------------|----------|---------------------------------------------------------|--------------------------|--------------|------------------|--------|---------------------------------------|-------------------------------------------|---------------------|--------------|----------|
|            | Atmospheric data      |            |          |                                                         |                          |              | Artificial data  |        |                                       |                                           | Input layer         | Output layer |          |
|            | Temperature           | Wind speed | Humidity | Additional data with duration of atmospheric phenomenon | Models with history data |              | Days of the week | Months |                                       |                                           |                     |              |          |
|            |                       |            |          |                                                         | One day ago              | Two days ago |                  |        |                                       |                                           |                     |              |          |
| 1          | +                     | –          | –        | –                                                       | –                        | –            | –                | –      | MLP 1-33-1                            | 33                                        | linear              | exponential  | 2.66     |
| 2          | +                     | +          | –        | –                                                       | –                        | –            | –                | –      | MLP 2-59-1                            | 59                                        | exponential         | logistic     | 2.60     |
| 3          | +                     | +          | –        | –                                                       | –                        | –            | –                | +      | MLP 26-13-1                           | 13                                        | linear              | exponential  | 2.17     |
| 4          | +                     | +          | –        | –                                                       | –                        | –            | +                | +      | MLP 40-13-1                           | 13                                        | exponential         | linear       | 2.55     |
| 5          | +                     | +          | –        | –                                                       | –                        | –            | +                | –      | MLP 16-38-1                           | 38                                        | tanh                | logistic     | 3.35     |
| 6          | +                     | –          | +        | –                                                       | –                        | –            | –                | –      | MLP 2-35-1                            | 35                                        | logistic            | logistic     | 2.86     |
| 7          | +                     | +          | +        | –                                                       | –                        | –            | –                | –      | MLP 3-53-1                            | 53                                        | exponetial          | logistic     | 2.87     |
| 8          | +                     | +          | +        | —                                                       | –                        | –            | –                | +      | MLP 27-16-1                           | 16                                        | linear              | exponetial   | 2.60     |
| 9          | +                     | +          | +        | –                                                       | –                        | –            | +                | +      | MLP 41-58-1                           | 58                                        | linear              | exponetial   | 3.17     |
| 10         | +                     | +          | +        | –                                                       | –                        | –            | +                | –      | MLP 17-76-1                           | 76                                        | logistic            | logistic     | 2.98     |
| 11         | +                     | –          | +        | +                                                       | –                        | –            | –                | –      | MLP 18-55-1                           | 55                                        | logistic            | exponetial   | 2.55     |
| 12         | +                     | +          | +        | +                                                       | –                        | –            | –                | –      | MLP 19-52-1                           | 52                                        | logistic            | logistic     | 2.32     |
| 13         | +                     | +          | +        | +                                                       | –                        | –            | –                | +      | MLP 43-6-1                            | 6                                         | exponetial          | exponetial   | 2.31     |
| 14         | +                     | +          | +        | +                                                       | –                        | –            | +                | +      | MLP 57-10-1                           | 10                                        | exponetial          | exponetial   | 2.91     |
| 15         | +                     | +          | +        | +                                                       | –                        | –            | +                | –      | MLP 33-64-1                           | 64                                        | exponetial          | linear       | 2.49     |

**Table SI.2.** Information about all artificial neural networks models for average temperature with 1 day ago

| No. Models  | Independent parameter |            |          |                                                         |                          |   |                  |        | Name of the artificial neural network | The number of neurons in the hidden layer | Activation function |              | MAPE [%] |
|-------------|-----------------------|------------|----------|---------------------------------------------------------|--------------------------|---|------------------|--------|---------------------------------------|-------------------------------------------|---------------------|--------------|----------|
|             | Atmospheric data      |            |          |                                                         |                          |   | Artificial data  |        |                                       |                                           | Input layer         | Output layer |          |
|             | Temperature           | Wind speed | Humidity | Additional data with duration of atmospheric phenomenon | Models with history data |   | Days of the week | Months |                                       |                                           |                     |              |          |
| One day ago |                       |            |          |                                                         | Two days ago             |   |                  |        |                                       |                                           |                     |              |          |
| 1           | +                     | −          | −        | −                                                       | +                        | − | −                | −      | MLP 2-13-1                            | 13                                        | tanh                | exponetial   | 2.42     |
| 2           | +                     | +          | −        | −                                                       | +                        | − | −                | −      | MLP 4-14-1                            | 14                                        | exponetial          | logistic     | 3.01     |
| 3           | +                     | +          | −        | −                                                       | +                        | − | −                | +      | MLP 28-48-1                           | 48                                        | exponetial          | linear       | 2.81     |
| 4           | +                     | +          | −        | −                                                       | +                        | − | +                | +      | MLP 42-3-1                            | 3                                         | exponetial          | linear       | 2.66     |
| 5           | +                     | +          | −        | −                                                       | +                        | − | +                | −      | MLP 18-28-1                           | 28                                        | exponetial          | logistic     | 3.32     |
| 6           | +                     | −          | +        | −                                                       | +                        | − | −                | −      | MLP 4-2-1                             | 2                                         | logistic            | tanh         | 2.93     |
| 7           | +                     | +          | +        | −                                                       | +                        | − | −                | −      | MLP 6-33-1                            | 33                                        | exponetial          | linear       | 3.53     |
| 8           | +                     | +          | +        | —                                                       | +                        | − | −                | +      | MLP 30-51-1                           | 51                                        | tanh                | linear       | 2.85     |
| 9           | +                     | +          | +        | −                                                       | +                        | − | +                | +      | MLP 44-5-1                            | 5                                         | exponetial          | linear       | 2.88     |
| 10          | +                     | +          | +        | −                                                       | +                        | − | +                | −      | MLP 20-44-1                           | 44                                        | exponetial          | logistic     | 3.53     |
| 11          | +                     | −          | +        | +                                                       | +                        | − | −                | −      | MLP 36-54-1                           | 54                                        | tanh                | exponetial   | 3.03     |
| 12          | +                     | +          | +        | +                                                       | +                        | − | −                | −      | MLP 38-64-1                           | 64                                        | logistic            | exponetial   | 3.05     |
| 13          | +                     | +          | +        | +                                                       | +                        | − | −                | +      | MLP 62-3-1                            | 3                                         | exponetial          | linear       | 2.97     |
| 14          | +                     | +          | +        | +                                                       | +                        | − | +                | +      | MLP 76-54-1                           | 54                                        | tanh                | exponetial   | 3.28     |
| 15          | +                     | +          | +        | +                                                       | +                        | − | +                | −      | MLP 52-19-1                           | 19                                        | logistic            | linear       | 3.06     |

**Table SI.3.** Information about all artificial neural networks models for average temperature with 2 days ago

| No. Models  | Independent parameter |            |          |                                                         |                          |   |                  |        | Name of the artificial neural network | The number of neurons in the hidden layer | Activation function |              | MAPE [%] |
|-------------|-----------------------|------------|----------|---------------------------------------------------------|--------------------------|---|------------------|--------|---------------------------------------|-------------------------------------------|---------------------|--------------|----------|
|             | Atmospheric data      |            |          |                                                         |                          |   | Artificial data  |        |                                       |                                           | Input layer         | Output layer |          |
|             | Temperature           | Wind speed | Humidity | Additional data with duration of atmospheric phenomenon | Models with history data |   | Days of the week | Months |                                       |                                           |                     |              |          |
| One day ago |                       |            |          |                                                         | Two days ago             |   |                  |        |                                       |                                           |                     |              |          |
| 1           | +                     | −          | −        | −                                                       | +                        | + | −                | −      | MLP 3-5-1                             | 5                                         | logistic            | tanh         | 2.61     |
| 2           | +                     | +          | −        | −                                                       | +                        | + | −                | −      | MLP 6-3-1                             | 3                                         | exponetial          | logistic     | 5.87     |
| 3           | +                     | +          | −        | −                                                       | +                        | + | −                | +      | MLP 30-7-1                            | 7                                         | exponetial          | linear       | 2.64     |
| 4           | +                     | +          | −        | −                                                       | +                        | + | +                | +      | MLP 44-2-1                            | 2                                         | exponetial          | linear       | 2.74     |
| 5           | +                     | +          | −        | −                                                       | +                        | + | +                | −      | MLP 20-58-1                           | 58                                        | exponetial          | logistic     | 2.79     |
| 6           | +                     | −          | +        | −                                                       | +                        | + | −                | −      | MLP 6-61-1                            | 61                                        | exponetial          | logistic     | 6.09     |
| 7           | +                     | +          | +        | −                                                       | +                        | + | −                | −      | MLP 9-6-1                             | 6                                         | logistic            | tanh         | 2.96     |
| 8           | +                     | +          | +        | —                                                       | +                        | + | −                | +      | MLP 33-17-1                           | 17                                        | tanh                | exponetial   | 2.86     |
| 9           | +                     | +          | +        | −                                                       | +                        | + | +                | +      | MLP 47-3-1                            | 3                                         | tanh                | exponetial   | 2.60     |
| 10          | +                     | +          | +        | −                                                       | +                        | + | +                | −      | MLP 23-51-1                           | 51                                        | linear              | logistic     | 3.00     |
| 11          | +                     | −          | +        | +                                                       | +                        | + | −                | −      | MLP 54-19-1                           | 19                                        | logistic            | exponetial   | 2.96     |
| 12          | +                     | +          | +        | +                                                       | +                        | + | −                | −      | MLP 57-35-1                           | 35                                        | logistic            | exponetial   | 2.86     |
| 13          | +                     | +          | +        | +                                                       | +                        | + | −                | +      | MLP 81-13-1                           | 13                                        | exponetial          | linear       | 3.45     |
| 14          | +                     | +          | +        | +                                                       | +                        | + | +                | +      | MLP 95-42-1                           | 42                                        | tanh                | exponetial   | 4.31     |
| 15          | +                     | +          | +        | +                                                       | +                        | + | +                | −      | MLP 71-64-1                           | 64                                        | logistic            | exponetial   | 2.97     |

**Table SI.4.** Information about all artificial neural networks models for min/max temperature

| No. Models | Independent parameter |            |          |                                                         |                          |              |                  |        | Name of the artificial neural network | The number of neurons in the hidden layer | Activation function |              | MAPE [%] |
|------------|-----------------------|------------|----------|---------------------------------------------------------|--------------------------|--------------|------------------|--------|---------------------------------------|-------------------------------------------|---------------------|--------------|----------|
|            | Atmospheric data      |            |          |                                                         |                          |              | Artificial data  |        |                                       |                                           | Input layer         | Output layer |          |
|            | Temperature           | Wind speed | Humidity | Additional data with duration of atmospheric phenomenon | Models with history data |              | Days of the week | Months |                                       |                                           |                     |              |          |
|            |                       |            |          |                                                         | One day ago              | Two days ago |                  |        |                                       |                                           |                     |              |          |
| 1          | +                     | −          | −        | −                                                       | −                        | −            | −                | −      | MLP 2-16-1                            | 16                                        | linear              | logistic     | 2.95     |
| 2          | +                     | +          | −        | −                                                       | −                        | −            | −                | −      | MLP 3-5-1                             | 5                                         | logistic            | tanh         | 2.85     |
| 3          | +                     | +          | −        | −                                                       | −                        | −            | −                | +      | MLP 27-60-1                           | 60                                        | linear              | tanh         | 14.72    |
| 4          | +                     | +          | −        | −                                                       | −                        | −            | +                | +      | MLP 41-7-1                            | 7                                         | linear              | exponetial   | 3.05     |
| 5          | +                     | +          | −        | −                                                       | −                        | −            | +                | −      | MLP 17-61-1                           | 61                                        | exponetial          | logistic     | 3.26     |
| 6          | +                     | −          | +        | −                                                       | −                        | −            | −                | −      | MLP 3-49-1                            | 49                                        | exponetial          | logistic     | 2.90     |
| 7          | +                     | +          | +        | −                                                       | −                        | −            | −                | −      | MLP 4-10-1                            | 10                                        | linear              | logistic     | 3.98     |
| 8          | +                     | +          | +        | —                                                       | −                        | −            | −                | +      | MLP 28-17-1                           | 17                                        | exponetial          | logistic     | 2.66     |
| 9          | +                     | +          | +        | −                                                       | −                        | −            | +                | +      | MLP 42-26-1                           | 26                                        | exponetia           | linear       | 3.93     |
| 10         | +                     | +          | +        | −                                                       | −                        | −            | +                | −      | MLP 18-54-1                           | 54                                        | exponetial          | logistic     | 3.60     |
| 11         | +                     | −          | +        | +                                                       | −                        | −            | −                | −      | MLP 19-27-1                           | 27                                        | tanh                | exponetial   | 2.70     |
| 12         | +                     | +          | +        | +                                                       | −                        | −            | −                | −      | MLP 20-36-1                           | 36                                        | tanh                | logistic     | 2.48     |
| 13         | +                     | +          | +        | +                                                       | −                        | −            | −                | +      | MLP 44-63-1                           | 63                                        | tanh                | exponetial   | 2.62     |
| 14         | +                     | +          | +        | +                                                       | −                        | −            | +                | +      | MLP 58-4-1                            | 4                                         | logistic            | exponetial   | 3.08     |
| 15         | +                     | +          | +        | +                                                       | −                        | −            | +                | −      | MLP 34-47-1                           | 47                                        | logistic            | logistic     | 2.66     |

**Table SI.5.** Information about all artificial neural networks models for min/max temperature with 1 day ago

| No. Models | Independent parameter |            |          |                                                         |                          |              |                  |        | Name of the artificial neural network | The number of neurons in the hidden layer | Activation function |              | MAPE [%] |
|------------|-----------------------|------------|----------|---------------------------------------------------------|--------------------------|--------------|------------------|--------|---------------------------------------|-------------------------------------------|---------------------|--------------|----------|
|            | Atmospheric data      |            |          |                                                         |                          |              | Artificial data  |        |                                       |                                           | Input layer         | Output layer |          |
|            | Temperature           | Wind speed | Humidity | Additional data with duration of atmospheric phenomenon | Models with history data |              | Days of the week | Months |                                       |                                           |                     |              |          |
|            |                       |            |          |                                                         | One day ago              | Two days ago |                  |        |                                       |                                           |                     |              |          |
| 1          | +                     | −          | −        | −                                                       | +                        | −            | −                | −      | MLP 4-2-1                             | 2                                         | exponetial          | logistic     | 3.60     |
| 2          | +                     | +          | −        | −                                                       | +                        | −            | −                | −      | MLP 6-2-1                             | 2                                         | logistic            | tanh         | 4.15     |
| 3          | +                     | +          | −        | −                                                       | +                        | −            | −                | +      | MLP 30-9-1                            | 9                                         | tanh                | logistic     | 3.45     |
| 4          | +                     | +          | −        | −                                                       | +                        | −            | +                | +      | MLP 44-2-1                            | 2                                         | exponetial          | tanh         | 4.12     |
| 5          | +                     | +          | −        | −                                                       | +                        | −            | +                | −      | MLP 20-36-1                           | 36                                        | logistic            | logistic     | 3.93     |
| 6          | +                     | −          | +        | −                                                       | +                        | −            | −                | −      | MLP 6-2-1                             | 2                                         | exponetial          | logistic     | 4.28     |
| 7          | +                     | +          | +        | −                                                       | +                        | −            | −                | −      | MLP 8-42-1                            | 42                                        | exponetial          | logistic     | 4.02     |
| 8          | +                     | +          | +        | —                                                       | +                        | −            | −                | +      | MLP 32-3-1                            | 3                                         | tanh                | linear       | 7.14     |
| 9          | +                     | +          | +        | −                                                       | +                        | −            | +                | +      | MLP 46-50-1                           | 50                                        | logistic            | exponetial   | 7.37     |
| 10         | +                     | +          | +        | −                                                       | +                        | −            | +                | −      | MLP 22-48-1                           | 48                                        | exponetial          | logistic     | 4.26     |
| 11         | +                     | −          | +        | +                                                       | +                        | −            | −                | −      | MLP 38-64-1                           | 64                                        | tanh                | exponetial   | 3.33     |
| 12         | +                     | +          | +        | +                                                       | +                        | −            | −                | −      | MLP 40-33-1                           | 33                                        | logistic            | exponetial   | 2.97     |
| 13         | +                     | +          | +        | +                                                       | +                        | −            | −                | +      | MLP 64-59-1                           | 59                                        | tanh                | exponetial   | 3.22     |
| 14         | +                     | +          | +        | +                                                       | +                        | −            | +                | +      | MLP 78-46-1                           | 46                                        | tanh                | exponetial   | 3.76     |
| 15         | +                     | +          | +        | +                                                       | +                        | −            | +                | −      | MLP 54-60-1                           | 60                                        | tanh                | exponetial   | 3.61     |

**Table SI.6.** Information about all artificial neural networks models for min./max. temperature with 2 days ago

| No. Models | Independent parameter |            |          |                                                         |                          |              |                  |        | Name of the artificial neural network | The number of neurons in the hidden layer | Activation function |              | MAPE [%] |
|------------|-----------------------|------------|----------|---------------------------------------------------------|--------------------------|--------------|------------------|--------|---------------------------------------|-------------------------------------------|---------------------|--------------|----------|
|            | Atmospheric data      |            |          |                                                         |                          |              | Artificial data  |        |                                       |                                           | Input layer         | Output layer |          |
|            | Temperature           | Wind speed | Humidity | Additional data with duration of atmospheric phenomenon | Models with history data |              | Days of the week | Months |                                       |                                           |                     |              |          |
|            |                       |            |          |                                                         | One day ago              | Two days ago |                  |        |                                       |                                           |                     |              |          |
| 1          | +                     | –          | –        | –                                                       | +                        | +            | –                | –      | MLP 6-60-1                            | 60                                        | exponetial          | logistic     | 3.69     |
| 2          | +                     | +          | –        | –                                                       | +                        | +            | –                | –      | MLP 9-55-1                            | 55                                        | logistic            | tanh         | 4.77     |
| 3          | +                     | +          | –        | –                                                       | +                        | +            | –                | +      | MLP 33-3-1                            | 3                                         | linear              | linear       | 3.96     |
| 4          | +                     | +          | –        | –                                                       | +                        | +            | +                | +      | MLP 47-8-1                            | 8                                         | exponetial          | linear       | 3.55     |
| 5          | +                     | +          | –        | –                                                       | +                        | +            | +                | –      | MLP 23-39-1                           | 39                                        | exponetial          | logistic     | 4.05     |
| 6          | +                     | –          | +        | –                                                       | +                        | +            | –                | –      | MLP 9-2-1                             | 2                                         | logistic            | tanh         | 4.33     |
| 7          | +                     | +          | +        | –                                                       | +                        | +            | –                | –      | MLP 12-27-1                           | 27                                        | tanh                | logistic     | 4.86     |
| 8          | +                     | +          | +        | —                                                       | +                        | +            | –                | +      | MLP 36-8-1                            | 8                                         | logistic            | exponetial   | 3.32     |
| 9          | +                     | +          | +        | –                                                       | +                        | +            | +                | +      | MLP 50-38-1                           | 38                                        | logistic            | exponetial   | 3.97     |
| 10         | +                     | +          | +        | –                                                       | +                        | +            | +                | –      | MLP 26-4-1                            | 4                                         | tanh                | logistic     | 3.75     |
| 11         | +                     | –          | +        | +                                                       | +                        | +            | –                | –      | MLP 57-2-1                            | 2                                         | tanh                | logistic     | 3.56     |
| 12         | +                     | +          | +        | +                                                       | +                        | +            | –                | –      | MLP 60-47-1                           | 47                                        | logistic            | logistic     | 3.38     |
| 13         | +                     | +          | +        | +                                                       | +                        | +            | –                | +      | MLP 84-8-1                            | 8                                         | exponetial          | linear       | 3.64     |
| 14         | +                     | +          | +        | +                                                       | +                        | +            | +                | +      | MLP 98-54-1                           | 54                                        | logistic            | exponetial   | 4.47     |
| 15         | +                     | +          | +        | +                                                       | +                        | +            | +                | –      | MLP 74-39-1                           | 39                                        | exponetial          | exponetial   | 3.31     |

**Table SI.7.** Information about all artificial neural networks models at a ground-level temperature

| No. Models | Independent parameter |            |          |                                                         |                          |              |                  |        | Name of the artificial neural network | The number of neurons in the hidden layer | Activation function |              | MAPE [%] |
|------------|-----------------------|------------|----------|---------------------------------------------------------|--------------------------|--------------|------------------|--------|---------------------------------------|-------------------------------------------|---------------------|--------------|----------|
|            | Atmospheric data      |            |          |                                                         |                          |              | Artificial data  |        |                                       |                                           | Input layer         | Output layer |          |
|            | Temperature           | Wind speed | Humidity | Additional data with duration of atmospheric phenomenon | Models with history data |              | Days of the week | Months |                                       |                                           |                     |              |          |
|            |                       |            |          |                                                         | One day ago              | Two days ago |                  |        |                                       |                                           |                     |              |          |
| 1          | +                     | −          | −        | −                                                       | −                        | −            | −                | −      | MLP 1-2-1                             | 2                                         | tanh                | exponetial   | 6.71     |
| 2          | +                     | +          | −        | −                                                       | −                        | −            | −                | −      | MLP 2-29-1                            | 29                                        | tanh                | tanh         | 6.25     |
| 3          | +                     | +          | −        | −                                                       | −                        | −            | −                | +      | MLP 26-54-1                           | 54                                        | linear              | exponetial   | 9.30     |
| 4          | +                     | +          | −        | −                                                       | −                        | −            | +                | +      | MLP 40-11-1                           | 11                                        | exponetial          | tanh         | 9.72     |
| 5          | +                     | +          | −        | −                                                       | −                        | −            | +                | −      | MLP 16-2_1                            | 2                                         | logistic            | logistic     | 6.40     |
| 6          | +                     | −          | +        | −                                                       | −                        | −            | −                | −      | MLP 2-25-1                            | 25                                        | linear              | tanh         | 6.26     |
| 7          | +                     | +          | +        | −                                                       | −                        | −            | −                | −      | MLP 3-22-1                            | 22                                        | linear              | tanh         | 5.69     |
| 8          | +                     | +          | +        | —                                                       | −                        | −            | −                | +      | MLP 27-18-1                           | 18                                        | linear              | exponetial   | 7.75     |
| 9          | +                     | +          | +        | −                                                       | −                        | −            | +                | +      | MLP 41-20-1                           | 20                                        | linear              | exponetial   | 7.62     |
| 10         | +                     | +          | +        | −                                                       | −                        | −            | +                | −      | MLP 17-47-1                           | 47                                        | linear              | tanh         | 5.57     |
| 11         | +                     | −          | +        | +                                                       | −                        | −            | −                | −      | MLP 18-60-1                           | 60                                        | logistic            | exponetial   | 2.51     |
| 12         | +                     | +          | +        | +                                                       | −                        | −            | −                | −      | MLP 19-41-1                           | 41                                        | tanh                | exponetial   | 2.44     |
| 13         | +                     | +          | +        | +                                                       | −                        | −            | −                | +      | MLP 43-46-1                           | 46                                        | tanh                | linear       | 2.55     |
| 14         | +                     | +          | +        | +                                                       | −                        | −            | +                | +      | MLP 57-11-1                           | 11                                        | exponetial          | tanh         | 3.12     |
| 15         | +                     | +          | +        | +                                                       | −                        | −            | +                | −      | MLP 33-29-1                           | 29                                        | logistic            | linear       | 2.89     |



**Table SI.8.** Information about all artificial neural networks models at a ground-level temperature with 1 day backdate

| No. Models | Independent parameter |            |          |                                                         |                          |              |                  |        | Name of the artificial neural network | The number of neurons in the hidden layer | Activation function |              | MAPE [%] |
|------------|-----------------------|------------|----------|---------------------------------------------------------|--------------------------|--------------|------------------|--------|---------------------------------------|-------------------------------------------|---------------------|--------------|----------|
|            | Atmospheric data      |            |          |                                                         |                          |              | Artificial data  |        |                                       |                                           | Input layer         | Output layer |          |
|            | Temperature           | Wind speed | Humidity | Additional data with duration of atmospheric phenomenon | Models with history data |              | Days of the week | Months |                                       |                                           |                     |              |          |
|            |                       |            |          |                                                         | One day ago              | Two days ago |                  |        |                                       |                                           |                     |              |          |
| 1          | +                     | –          | –        | –                                                       | +                        | –            | –                | –      | MLP 2-7-1                             | 7                                         | exponetial          | logistic     | 6.36     |
| 2          | +                     | +          | –        | –                                                       | +                        | –            | –                | –      | MLP 4-13-1                            | 13                                        | exponetial          | logistic     | 6.51     |
| 3          | +                     | +          | –        | –                                                       | +                        | –            | –                | +      | MLP 28-46-1                           | 46                                        | linear              | exponetial   | 5.50     |
| 4          | +                     | +          | –        | –                                                       | +                        | –            | +                | +      | MLP 42-5-1                            | 5                                         | linear              | exponetial   | 9.57     |
| 5          | +                     | +          | –        | –                                                       | +                        | –            | +                | –      | MLP 18-12-1                           | 12                                        | linear              | tanh         | 6.03     |
| 6          | +                     | –          | +        | –                                                       | +                        | –            | –                | –      | MLP 4-10-1                            | 10                                        | linear              | tanh         | 6.57     |
| 7          | +                     | +          | +        | –                                                       | +                        | –            | –                | –      | MLP 6-15-1                            | 15                                        | exponetial          | logistic     | 5.35     |
| 8          | +                     | +          | +        | —                                                       | +                        | –            | –                | +      | MLP 30-17-1                           | 17                                        | exponetial          | linear       | 6.74     |
| 9          | +                     | +          | +        | –                                                       | +                        | –            | +                | +      | MLP 44-7-1                            | 7                                         | exponetial          | linear       | 6.30     |
| 10         | +                     | +          | +        | –                                                       | +                        | –            | +                | –      | MLP 20-35-1                           | 35                                        | linear              | tanh         | 5.50     |
| 11         | +                     | –          | +        | +                                                       | +                        | –            | –                | –      | MLP 36-59-1                           | 59                                        | logistic            | exponetial   | 3.25     |
| 12         | +                     | +          | +        | +                                                       | +                        | –            | –                | –      | MLP 38-20-1                           | 20                                        | tanh                | exponetial   | 3.12     |
| 13         | +                     | +          | +        | +                                                       | +                        | –            | –                | +      | MLP 62-37-1                           | 37                                        | tanh                | exponetial   | 3.76     |
| 14         | +                     | +          | +        | +                                                       | +                        | –            | +                | +      | MLP 76-51-1                           | 51                                        | tanh                | exponetial   | 4.39     |
| 15         | +                     | +          | +        | +                                                       | +                        | –            | +                | –      | MLP 52-38-1                           | 38                                        | tanh                | exponetial   | 3.91     |

**Table SI.9.** Information about all artificial neural networks models at a ground-level temperature with 2 days ago

| No. Models | Independent parameter |            |          |                                                         |                          |              |                  |        | Name of the artificial neural network | The number of neurons in the hidden layer | Activation function |              | MAPE [%] |
|------------|-----------------------|------------|----------|---------------------------------------------------------|--------------------------|--------------|------------------|--------|---------------------------------------|-------------------------------------------|---------------------|--------------|----------|
|            | Atmospheric data      |            |          |                                                         |                          |              | Artificial data  |        |                                       |                                           | Input layer         | Output layer |          |
|            | Temperature           | Wind speed | Humidity | Additional data with duration of atmospheric phenomenon | Models with history data |              | Days of the week | Months |                                       |                                           |                     |              |          |
|            |                       |            |          |                                                         | One day ago              | Two days ago |                  |        |                                       |                                           |                     |              |          |
| 1          | +                     | −          | −        | −                                                       | +                        | +            | −                | −      | MLP 3-14-1                            | 14                                        | exponetial          | logistic     | 5.69     |
| 2          | +                     | +          | −        | −                                                       | +                        | +            | −                | −      | MLP 6-24-1                            | 24                                        | exponetial          | logistic     | 5.84     |
| 3          | +                     | +          | −        | −                                                       | +                        | +            | −                | +      | MLP 30-32-1                           | 32                                        | logistic            | linear       | 8.06     |
| 4          | +                     | +          | −        | −                                                       | +                        | +            | +                | +      | MLP 44-44-1                           | 44                                        | tanh                | exponetial   | 9.09     |
| 5          | +                     | +          | −        | −                                                       | +                        | +            | +                | −      | MLP 20-8-1                            | 8                                         | linear              | tanh         | 5.77     |
| 6          | +                     | −          | +        | −                                                       | +                        | +            | −                | −      | MLP 6-7-1                             | 7                                         | linear              | tanh         | 6.03     |
| 7          | +                     | +          | +        | −                                                       | +                        | +            | −                | −      | MLP 9-3-1                             | 3                                         | exponetial          | logistic     | 5.06     |
| 8          | +                     | +          | +        | —                                                       | +                        | +            | −                | +      | MLP 33-37-1                           | 37                                        | logistic            | linear       | 5.44     |
| 9          | +                     | +          | +        | −                                                       | +                        | +            | +                | +      | MLP 47-2-1                            | 2                                         | tanh                | exponetial   | 5.60     |
| 10         | +                     | +          | +        | −                                                       | +                        | +            | +                | −      | MLP 23-6-1                            | 6                                         | tanh                | logistic     | 5.61     |
| 11         | +                     | −          | +        | +                                                       | +                        | +            | −                | −      | MLP 54-46-1                           | 46                                        | tanh                | exponetial   | 3.64     |
| 12         | +                     | +          | +        | +                                                       | +                        | +            | −                | −      | MLP 57-57-1                           | 57                                        | tanh                | exponetial   | 3.38     |
| 13         | +                     | +          | +        | +                                                       | +                        | +            | −                | +      | MLP 81-61-1                           | 61                                        | tanh                | exponetial   | 4.39     |
| 14         | +                     | +          | +        | +                                                       | +                        | +            | +                | +      | MLP 95-62-1                           | 62                                        | logistic            | exponetial   | 4.31     |
| 15         | +                     | +          | +        | +                                                       | +                        | +            | +                | −      | MLP 71-39-1                           | 39                                        | linear              | logistic     | 3.55     |

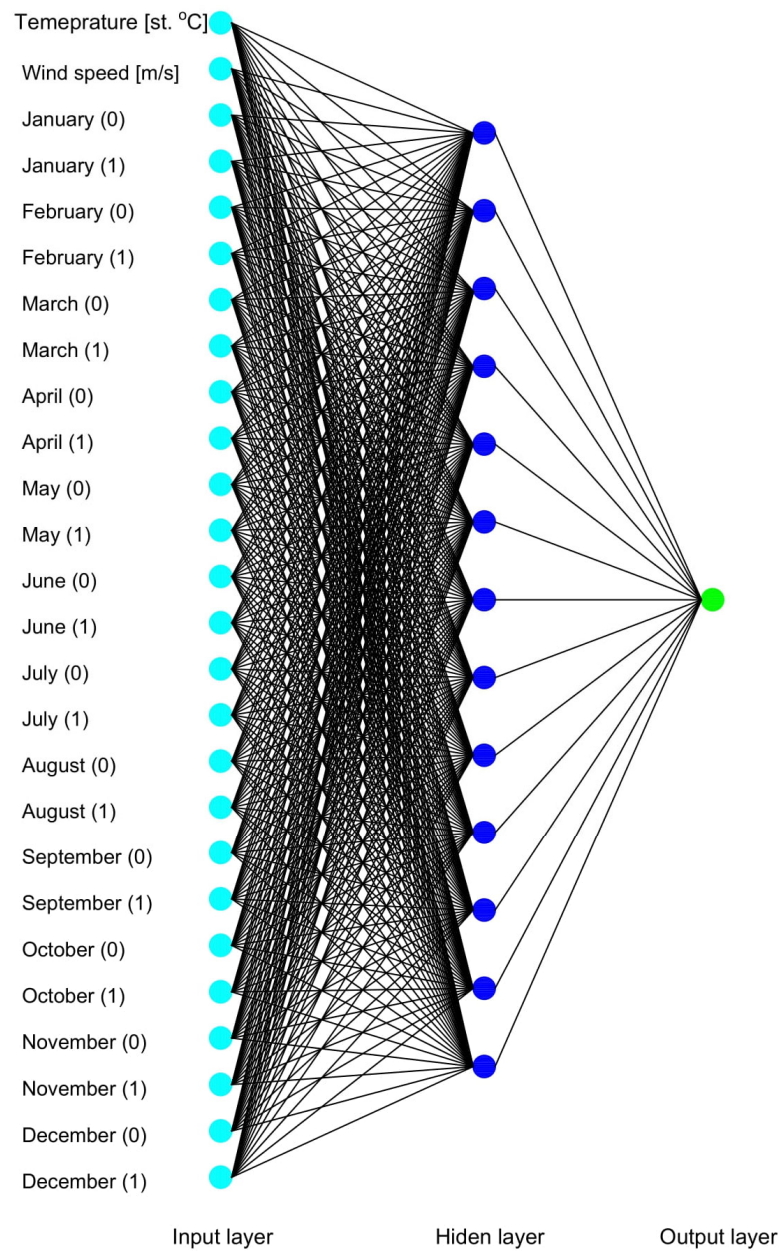

**Figure SI.1.** Topology of the best neural network MLP 26-13-1
